# Supplementary material for: High-Frequency Homologous Recombination Occurred Preferentially in Populus
Source: Front Genet. 2021 Aug 19;12:703077. doi: 10.3389/fgene.2021.703077 (PMC8417060; doi:10.3389/fgene.2021.703077)
Supplement: Supplementary Table 1 — Primer information to detect hDNA in P. tomentosa. [file Table_1.XLSX]

## Sheet: Sheet1
Supplemental table 1. Primer information to detect hDNA in P.tomentosa
SSR name	Chr	Position (Mbp)	Motif	Primer sequence(5’→3’)	allele in 3532 (bp)	allele in 3119(bp)	allele in YX1(bp)
LG_Ⅰ-18	1	0.047	atta	F: CACGCTAAGATTGTCTCACA	320/332	320/332	320/328
				R: TCACTGCATCAAGAAGATTG
LG_Ⅰ-22	1	0.059	agcag	F: AGATAAGCATGGCTTGTTGT	309/314	309/314	309
				R: CGTTACCATTCATTCCAAAT
MB62730	1	0.084	at	F: GGATTGATCGGAAGGGATCT	293/295	293/295	293/299
				R: GGCCATACTGACCTGGTTGT
Ptr_1_SSR2	1	0.095	aaga	F: TCTCAATTACATCCCAATCC	399/407	399/407	393/396
				R: GGTTGATTCACCAGCAGTAT
PTSSR382	1	0.104	gcg	F: CGCCTTTTCTCCTTCCCCTT	423/428	423/428	431
				R: GACGCCGTTGTACAAAGCTC
Ptr_1_SSR4	1	0.133	atc	F: AAAGATACGCGTAAGAGCAG	408/414	408/414	408
				R: CACAGTTTCCAATCTCCAAT
Ptr_1_SSR5	1	0.207	tca	F: CTTTCCTCTTCAACAACTGG	351/366	351/366	354
				R: CCCAACAATTTCCTCATAAA
MB62786	1	0.224	at	F: ATTGTGGTGCAGATGCTGAG	237/258	237/258	258/274
				R: GCCTGTGCCATGCTATGTAA
GCPM_2935-2	1	0.275	ttc	F: TCAGCTTCAGCTTCTTCTTC	192/204	192/204	198
				R: AATTTGAAAAGGAAAAACCC
MB62794	1	0.281	ta	F: TAGCCAGCCTCCTCAAGAAA	238/248	238/248	238/247
				R: ATTTGCATGGGACCATGATT
Ptr_1_SSR8	1	0.498	gtg	F: CCAAATGAAGGGAAATATGA	218/224	218/224	221/224
				R: AAACACTCAACATCTCCTGG
MB62901	1	0.498	tgg	F: GCTCCCACAGCTGATTCTTC	188/194	188/194	191/194
				R: GAACCCCACCTCTCCTCTTC
MB62921	1	0.623	gga	F: ATCATCTTTCGCGTTTTTGG	239/245	239/245	239/*
				R: TCCCGCTCCCTCTTTATTTT
MB62993	1	0.767	(cg)c(ag)	F: TAGGGAGCAAAAAGCCAAGA	292/298	292/298	292/299
				R: GATTTGTGGTCCGCCATATT
MB63029	1	0.892	gaa	F: ACCACGCCAAATAAGCAAAG	151/155	151/155	151/159
				R: CACATGGTGCTGAGGAATTG
PTSSR619	1	0.937	ctc	F: GGGAGGAAGAAGCAAGGAGC	272/281	272/281	272/287
				R: CTCCATTTGCTTCTTCGGCG
Ptr_4_SSR1	1	0.988	agat	F: TTAAGCCTTCTTTCTGTTGC	346/350	346/350	342/346
				R: AAGTCTTTGTGAATGGATGG
LG_Ⅰ-1223	1	1.241	gca	F: ATATCACTCGCCAAGTCAAC	190/193	190/193	196/199
				R: ATCACGCACAAGTTAGGTTT
LG_Ⅰ-1114	1	1.424	ta	F: AAGTGGATCAGGTGATGAAG	156/166	156/166	165
				R: CAATGTCTTTCGGTTCTTTC
PTSSR1961	1	1.743	ga	F: GGCTGTTGTGGGATCCATCA	255/265	255/265	255/263
				R: CTACCAGCAGTCCACCGTTC
LG_Ⅰ-1065	1	1.753	agc	F: AATGGAGGTCCCTAGCTTAC	383/386	383/386	386
				R: TGATATTGCTGGGCTATCTT
LG_Ⅰ-1027	1	1.834	ta	F: TGAGCTTAGGAACGAAGAAG	188/198	188/198	184/186
				R: CATCAATATGACTCCTCGGT
LG_Ⅰ-1125	1	1.835	tca	F: GATGCTTACCCTTTGCTCTA	400/409	400/409	400
				R: CATAATGGGCAAAGAATACC
PTSSR1631	1	2.176	ag	F: GTTTGGCAAACTGAGCAGCA	286/292	286/292	292
				R: ACCTAAAGCGAAGGCAAGGA
PTSSR2110	1	2.226	atc	F: GCAGCATCATTTGGATTGCG	217/244	217/244	217
				R: TGTTTTTGCACAGTCGCCTG
PTSSR1211	1	4.346	ct	F: TTACAACAGGGAGATCCGGC	156/160	156/160	160
				R: GCAGATCGAGAGGGGAGAGA
GCPM_3979-1	1	4.749	ga	F: TATCAATTTCCGTGGATTTC	192/196	192/196	193
				R: GAAACTGAGAGGACTTGCTG
Ptr_1_SSR41	1	5.503	gaaa	F: AAAGCACCTCCTCTCTTTCT	272/280	272/280	272
				R: TGTGCTTCCTCTTCTCTAGC
Ptr_1_SSR48	1	6.328	acc	F: TTTCCTCAGAGATGCTGTTT	252/255	252/255	246/255
				R: TGTCTTCCCTTAGTCACCAC
GCPM_124	1	6.328	cac	F: TTTGAGCACTTCAACTACCA	207/210	207/210	202/210
				R: TGTCTTCCCTTAGTCACCAC
PTSSR2100	1	8.583	cct	F: CCTGAACTACCATCCAGCGG	242/254	242/254	242/248
				R: GCTTTGGAATTGTTGCCGGT
PTSSR2099	1	8.584	taa	F: ACTCATGTTCTAGAAGCACGTCT	198/210	198/210	195/198
				R: CAATGGTTGGTTGCTTCGCA
GCPM_1960-1	1	11.783	gaaa	F: TATCGAATCACAATGGCATA	220/224	220/224	220
				R: TGCTCAGGTCATCTTTTCTT
MB79984	1	13.055	t	F: ACCAGATCCTCCAAATGCTG	266/280	266/280	280/282
				R: CTCTTAGCTCCTCCCATCCC
MB79879	1	13.294	ac	F: TGCATCCATCTCCAATTTCA	269/273	269/273	280/284
				R: AGGCGGGTCCTTGTAAAACT
MB79812	1	13.44	gag	F: CAAGGGGGCAGTAGCAATAG	211/217	211/217	217/220
				R: TTGCTCCACTATTTCGGTCC
MB79711	1	13.738	agg	F: AGGCTTTGGTGTTGGTTTTG	253/271	253/271	250/265
				R: CTCTTTAGGCCTCGCCTCTT
MB79671	1	13.82	tc	F: TCTTTTGGCTTTGCTTGCTT	271/275	271/275	271/277
				R: AGAACAGTTTGCTGGGCAGT
MB79616	1	13.95	gt	F: GGGAGCTTTGGAGACATCAG	296/299	296/299	292/298
				R: AAGATGCCACAGGCTTTTGT
MB79489	1	14.241	aat	F: GAAAGGCATTGATGACCCAC	260/262	260/262	*/260
				R: ACGCAGACTCTTGGCTTGAT
MB79469	1	14.332	at	F: TGTTCGACCCGGTAATCTTC	234/250	234/250	232/*
				R: TATCCAAACATCAACGGCAA
Ptr_1_SSR64	1	14.354	tgc	F: GATTGCTGTTGTTGTTGATG	323/329	323/329	299/335
				R: AGCAAATGCCAACAATATCT
MB79431	1	14.39	attt	F: TTGAGAGATGGTTTGGGCTC	214/222	214/222	214/218
				R: AACTCACGTTAGGGTGTGACG
MB79313	1	14.725	ttg	F: TGGTTAATGGGAATCTGTCG	288/300	288/300	277/285
				R: ATTCATCCATTTCTGAGCCG
MB79310	1	14.735	ct	F: TATTTTAGCGCCGATTCAGG	265/275	265/275	269/278
				R: CAATCCAATAGCGGGCATAG
Ptr_1_SSR69	1	15.13	gtgag	F: TAGTTTACCGTTGAGGAGGA	243/248	243/248	242/252
				R: AAATTCAATGATGGAAGTGC
Ptr_1_SSR73	1	15.618	atgt	F: CCAAGCATTATGGCTTATTC	294/308	294/308	316/*
				R: CGTTCTAGATGGCTTACCTG
GCPM_3408	1	20.668	gt	F: ATGGAAGTTTGAGTCCACTG	202/212	202/212	200/202
				R: CATGCATTACTTCAACCCTT
MYB_SSR4	1	20.668	gt	F: GGAAGTTTGAGTCCACTGAC	212/214	212/214	208
				R: CATGCATTACTTCAACCCTT
PTSSR2826	1	20.751	agg	F: ACCATGAAAGGCCGCCAATA	286/295	286/295	286/298
				R: TTTGCGCTCACCCAAAAACC
Ptr_1_SSR75	1	21.483	ttc	F: ACCTCCCATTCTTTGGTACT	231/243	231/243	231/237
				R: TCAATCATTGCTTCTTTCCT
Exp10_SSR2	1	25.19	ct	F: GTGCCCTTCTAGCCTACCTT	239/263	239/263	251/253
				R: AGGAATTCTAGCTTCAGCCAT
PTSSR2102	1	26.575	ag	F: CAGGGCATCACAGGAACAGA	233/239	233/239	233/235
				R: TTAGTTGACACGCGTTGCAC
GCPM_2453-1	1	28.263	ggt	F: ACACCAAGAGCTGTAGCATT	216/222	216/222	216/219
				R: ACAACATGGCCTAACTCATC
PTSSR791	1	30.04	agc	F: CCTCTCTCCCTCTCCTTCCA	269/272	269/272	266/272
				R: GCCTTGTGGGTTTGGTGTTG
PTSSR2536	1	32.175	ag	F: GCCTCTTGGACGGACTTCAA	182/186	182/186	182/194
				R: AAAAGAAGCTCCACCAGGGA
PTSSR99	1	32.751	tgg	F: TTTGAGGCTGCTGAGAGTGG	199/208	199/208	196/199
				R: TCTAACCCCTCTCCACCACC
MB73379	1	34.576	aag	F: GCTCATGGTCGCAAGAAACT	240/248	240/248	240/243
				R: GCAAGAACGTGTTTCCAGGT
MB73377	1	34.576	aag	F: ACATGTTGAGCTCATGGTCG	248/256	248/256	248/252
				R: GCAAGAACGTGTTTCCAGGT
MB73453	1	34.696	t	F: ACAGCATTGTTACCCAAGCA	248/260	248/260	*/251
				R: CTCCAAAACCCTCAAACCAA
PTSSR1138	1	34.727	gtg	F: TGCGACCCAAATGATTGTTGT	160/163	160/163	160/166
				R: GGCAAGCCAATTGGAGTTCG
MB73496	1	34.762	ac	F: TTCATGAGGTGGCGTTTACA	148/174	148/174	171/174
				R: TTTTGTTTGATTGCCGTTTG
MB73581	1	34.974	ctc	F: GAGTTGAGCTCCACCCTCCT	162/165	162/165	157/164
				R: GCTCTGATGTTGGGGATGAT
MB73607	1	35.069	ata	F: TTGTTTGGTCGGTTTGATGA	271/275	271/275	263/271
				R: TAGAGCTGACGTGGATGGTG
MB73692	1	35.319	ct	F: AGCCAAGTGTACACCAACCC	158/166	158/166	176/202
				R: GCTCCATGCAGTAGAGAGGG
MB73751	1	35.494	cac	F: ATCCTCCAAATCCCACAACA	197/205	197/205	197/203
				R: ACGAAAGCCAAAGCAGAAGA
MB73780	1	35.578	aaag	F: CACCAGGAGAGCAGAAAAGG	276/280	276/280	265/275
				R: GGCCATCAAAAGAATCTCCA
MB73879	1	35.86	ac	F: GAATCCGAAACGTCACACCT	280/282	280/282	278/280
				R: ATTGCCCGTTAGTCCATTCA
MB74027	1	36.158	ct	F: CCCTGCACAAGAAATCCAGT	182/182	182/182	180
				R: TCGAGTTGCTGAATAACCCA
MB74049	1	36.223	ttc	F: CAGAGGCCAATTATTGCTGC	207/209	207/209	*/213
				R: TGGGTCTCTGCTTCCTGTCT
MB74184	1	36.511	ttc	F: CGTCTTTCCACAACCAGGTC	194/202	194/202	206
				R: GCGGGTCAAAGAAATCGTTA
MB74206	1	36.635	ctt	F: GAGTTGCACCTGCTTTCCTC	266/278	266/278	278/284
				R: TACACCATTCCAGTGCCAGA
GCPM_1719	1	36.636	aaag	F: AAGTGCTCATAACATCACCC	216/228	216/228	227/234
				R: CTTTCCTCATTCCTGTTCTG
MB74273	1	36.878	at	F: CTGCAAGTCCTCCTTTCTGG	131/133	131/133	133
				R: ACGGTTTCGAGAAGAGCAAA
MB74291	1	36.898	ta	F: ATCACGGTGGTGTGGACTTT	284/288	284/288	278/284
				R: CATAGTTTTTGCTCATAATCACGG
MB74355	1	37.09	ttat	F: CGCTACTGGGACAAGTCGAT	214/220	214/220	214/218
				R: CACCATCACCACCCTCTCTT
MB74365	1	37.128	aag	F: CCCTTCCACTCCTGTCAGTC	207/210	207/210	207
				R: ATCGATTCGGGTTGTGGATA
MB74423	1	37.375	a	F: GGGGGAAATCTTCCATAACC	288/293	288/293	283/289
				R: GCTCCTTTTCTTCTTATTTCATGC
MB78637	1	38.485	tg	F: CAACAATGCGAGGAAGTTCA	290/294	290/294	294/296
				R: CCTGCAATCCTCAAAACCAT
MB78738	1	38.806	tct	F: TTCTTCTGCTCTTCGCTTCC	178/181	178/181	181/184
				R: AGCGATGCTATCTGGTCGTT
MB78858	1	39.049	gaa	F: TTCCTGACGAGGCATTTACC	207/222	207/222	207/225
				R: TTTGATGCAAAGAGCACAGC
MB79027	1	39.546	ga	F: GATGTGCTCCACGTGACATT	215/224	215/224	213/215
				R: ATGCCACCAGAACTGGATTC
MB79074	1	39.661	ag	F: ACTGCAAGATGTCCCAATGA	241/244	241/244	241/*
				R: GCAGGCGAGATATTGCTAGG
GCPM_1263-1	1	41.934	ct	F: TGCATTAAGACATCACTTGC	235/243	235/243	230/232
				R: TTCGCTTCTGTATTTCCTGT
PTSSR1686	1	42.469	ttc	F: TCAGGATCGGAGTCGGAGTT	165/168	165/168	165
				R: TGAGCAGAAACGACACCACT
Ptr_13_SSR56	1	44.136	ac	F: TCAGTAGCCATGAATCCTTT	352/366	352/366	354/*
				R: AGAGGAAGGAAGCCCTAGTA
Ptr_13_SSR59	1	44.361	at	F: CTTGAATCTGAGTTCTTGCC	336/338	336/338	331/333
				R: GCACTTTCTTGTCAACCTTC
PTSSR2823	4	0.147	ctg	F: TCATGAATGAGCTGCCGGTT	259/262	259/262	262
				R: GAGGACAGAGAGGTCTTGGC
GCPM_2625-1	4	0.188	gt	F: GATTTCTATTGTGGCAAAGG	187/193	187/193	187
				R: TGTATTCCTCCACTCCACTC
GCPM_1116-1	4	0.401	tca	F: GGGGCTAATATCAGTTTCCT	195/201	195/201	195
				R: TGAGAAAACCCTGGAAAATA
ORPM_394	4	0.667	tgc	F: AAAAAGCCCCACAATTATTCA	222/225	222/225	222/231
				R: GCAAGTTGCAATTGATGTCC
MB61699	4	1.393	at	F: GGCATGGAAGTTGCAGAAAT	186/189	186/189	185/189
				R: ATCATCATTGCCCCAAATGT
GCPM_3437	4	2.481	ag	F: AAGATCTGGTGTTGTTTTGG	234/236	234/236	236/242
				R: TTCTTAACAGAAGCCAGGAG
Ptr_4_SSR8	4	2.792	atg	F: CGACAACAACAACAACAAAC	254/260	254/260	257/*
				R: TGAACCAACCTAACTGATCC
PTSSR7	4	3.044	ct	F: TCCGCATCAGATCCAAACCC	291/293	291/293	293
				R: CAAACCACCGGTTCATTGCA
PTSSR2893	4	3.515	ga	F: AAGTTTGGGCGGTGTTTGTG	278/306	278/306	300/306
				R: CAAGGGAGGGAATTCCAGGC
PTSSR289	4	3.842	taa	F: GAGCATCACGGCAAAGCTTC	184/190	184/190	195/198
				R: ATCCCGAGTGCATGGTTGTT
PTSSR827	4	3.926	ctt	F: GCTCCTTCCCTTGGATCCAC	255/261	255/261	255
				R: AAGCAAATTTCCTCCAGCGC
GCPM_3971-1	4	4.122	taaa	F: CAGCCAGCCTCTTTAAGATA	193/211	193/211	202/220
				R: ACAGCAATTCTGTACCTCGT
Ptr_4_SSR19	4	4.122	tcaa	F: AGCTATAACACGTCCACCAT	390/406	390/406	398/414
				R: TGTCACAACAATTCTGGAAA
MB80387	4	4.396	at	F: CCGGTGAGATCCTCCAAATA	279/271	279/281	281/*
				R: GGAGCTGCAGAAAAGATAGCA
PTSSR2610	4	4.41	tc	F: AACCATCCCTGTGAACTCCA	291/301	291/301	289/291
				R: CGGAAAAGGGACGATTTTGGG
MB71716	4	4.581	t	F: GATGAACAGCCCAGAAAAATG	249/251	249/251	*/249
				R: GCTGTTGGAGTTTGAGAGCC
MB121712	4	4.596	at	F: GAGTGGCAGAGAGGCAGTTC	238/278	238/278	286/290
				R: AAAATACTTGGCCCCCAAAC
MB71706	4	4.596	gat	F: GGGCATGTCTTTACGCATTT	219/222	219/222	219
				R: GTCCTCTTTTCTTCGGTCCC
MB121694	4	4.635	ga	F: GCATGAATTTGGGGAATGAG	125/131	125/131	121/129
				R: TGCAAACACAAAGCAAAAGG
MB121678	4	4.65	tc	F: GGGCGACACTGCTCATATTT	208/211	208/211	211/213
				R: TTCAATGCCACACAATGCTT
MB71685	4	4.65	tc	F: TATTCCTCAGAAGATGGGCG	223/226	223/226	226/229
				R: TTCAATGCCACACAATGCTT
MB121668	4	4.667	aac	F: CGACCAGGAGCATTGATTTT	282/288	282/288	285/288
				R: GATGAGGGACCCTGAGATGA
PTSSR1266	4	4.688	ct	F: AGTTTGCCGATCTCGTACCG	214/216	214/216	208/226
				R: AGGTTACCTCTTTCTGTCTTTCTT
GCPM_1297-1	4	4.758	tct	F: GGGATGAATCAGGAGATGTA	135/141	135/141	140
				R: GAAGAAACCTGTGGGTGATA
MB71636	4	4.761	cct	F: TGGAGTTGGTTGTGGCAGTA	187/200	187/200	191/194
				R: AAAGTGGGGAAGTCATCGTG
MB71515	4	5.067	agg	F: CCATTAGCGAGGGACAAAAA	265/271	265/271	246/265
				R: GTTGTCCATTCTCCATTGGC
MB71513	4	5.085	aga	F: CCCGACAAGACAAATGTCAA	257/263	257/263	255/257
				R: CAAAACGGGTTGTTTTTGCT
MB121515	4	5.215	aacaaa	F: TGTTCAATGGTCTTCAAATCAGA	262/266	262/266	262
				R: GTGGGCCAGATGATCAATTC
MB121381	4	5.558	t	F: AAATCACTGCCAAAGATGCC	280/288	280/288	276/282
				R: TTGTTGGGCTTTTCCTCAAG
MB121374	4	5.566	ag	F: CCCTTCCTTTACATTGCTGG	286/288	286/288	284
				R: TTCTGGCAACCAGAGACAAA
MB121361	4	5.586	tgc	F: AAGAAATCGTTGGGGAAAGG	277/306	277/306	299/306
				R: GCCAGGGCATGTTATCAGAA
ORPM_421	4	5.65	ta	F: AAATGATGTTGCGATTTCCA	213/221	213/221	219
				R: TCCCATCTCAACTACTCCAACA
PTSSR1738	4	6.603	ctcttc	F: CTTCCTCGTTTGGCCCCTAA	213/221	213/221	219
				R: ACCAGCTAGTTCGGGCTTTC
PTSSR1091	4	7.429	ctc	F: CTTGTGTCAACCCATGTGCC	257/259	257/259	254/*
				R: ACAACTCCAAGGCCAACCAA
ORPM_201	4	7.736	tc	F: GACTCCACCCAGTTCTGCTC	214/226	214/226	224/226
				R: AACTTCCCATCGAATGATCG
PTSSR1873	4	8.381	ga	F: GCGTGAGATGAGGGAGAGTG	184/198	184/198	186/202
				R: CGTCAGGCGACAATTCCAAC
PTSSR2543	4	8.42	ag	F: ACGAAGCCAAGTCTGCAAGA	268/274	268/274	266/*
				R: GCCCACCGAATTACACCTCA
PTSSR1932	4	9.402	tac	F: CGGCAGGTCTGATGTCTTCA	120/123	120/123	117/123
				R: CCATGGAGTCTAAAGGTGGCA
Ptr_4_SSR40	4	9.587	gag	F: AGATATCCATTCTGCAAACC	423/426	423/426	417/426
				R: ATGATCCTTTCCTTCTCCAT
MB85086	4	10.962	aac	F: AAACAAGCAGGGATGCAAAC	229/232	229/232	232/*
				R: CATGAAAAATCAGAGCGCAA
MB85051	4	11.071	ga	F: TGAACAAGGGCTTAAATGGG	273/275	273/275	277/285
				R: TGCCCTCATTCTTTGCTCTC
MB84919	4	11.497	tg	F: TCCTTTTCTACCGATTCCTTTG	283/291	283/291	283/285
				R: CTATGATGTCCTCCGTGGGT
PTSSR2651	4	11.586	gag	F: AACCTAGCGTGACTTGGAGC	255/261	255/261	255
				R: CGCACACAAAAACCCTAGCA
Ptr_4_SSR47	4	11.896	ta	F: GGAACAGGTCGTTTGAGATA	352/374	352/374	352/384
				R: GGTATTTGATACTCGAGGCA
MB84860	4	11.982	aag	F: GCACTAGACAATCCACGCAA	251/257	251/257	257/263
				R: CAAGGACAAGTTGGAGCCAT
MB105809	4	13.765	tc	F: GTTGGTTGTTGGCTGGCTAT	254/276	254/276	277/278
				R: GCATCAGGACATGGGTCTTC
Ptr_4_SSR43	4	14.764	ga	F: CCTTTCTGTATTGTCCTTCG	372/374	372/374	359/383
				R: TTGAATACCAAAGGCATCTT
PTSSR1237	4	15.392	aca	F: GAGGAGGAGGAGTGCGATTG	207/210	207/210	204/*
				R: GCAGCTTCGACTGCTTTCAT
GCPM_3819-1	4	16.315	gaa	F: ATCATCAAGTTCACGAAAGC	240/243	240/243	237
				R: ACTGACCTACCACCATTTTG
GCPM_295-1	4	16.784	aag	F: TAAGAGGATTACCAGGCAGA	182/198	182/198	190
				R: CCCACTAACAATAAGCTTGG
PTSSR1056	4	16.887	ttc	F: TCCAATCTTTCGGTCCACGT	257/260	257/260	254/266
				R: TCTCCATCGTGCATGATCGG
Ptr_4_SSR65	4	19.931	gga	F: CTATCATAGCCCTCGAACAG	233/242	233/242	233/236
				R: ATAGCGGTTATGCAATGAGT
PTSSR1653	4	19.931	cct	F: TGAATCTTCGTCGCCTGCTT	249/258	249/258	249/252
				R: TCAAGAAATCCCAAGCTGAAGC
PTSSR1623	4	20.046	gat	F: CATCTCCCACCACCACAACA	238/247	238/247	238
				R: CTCTGCGTAAACAACTGCGG
PTSSR2267	4	21.767	tca	F: TGGAAGGCAAATCGTCGTCA	195/198	195/198	195
				R: AAGTGGAGCAGACAGACACT
PTSSR2790	4	21.767	tgg	F: ACTGCAAGCAATGAAGACGA	198/204	198/204	200
				R: CCCGTATTTCATGCACTGCG
GCPM_3234-1	4	21.772	agc	F: TCTCAATGTCGACACCATTA	136/145	136/145	142/148
				R: TGCAAGAACTGCTATCACTG
MB84509	4	23.981	tct	F: TGCAGAAATGGAAATGAGGA	295/310	295/310	292/295
				R: TCAATGATGTTTTGCTTTCGTT
MB84480	4	24.052	tg	F: CCCAGGGAACCTTTGAAAAA	236/244	236/244	254/260
				R: AAAAACAAAGGCTCACACGG
MB84465	4	24.078	ta	F: TGTCTTTTGAGTGCTGCTGG	271/273	271/273	266/276
				R: AGATGTCGAGTTGGGCTCAT
PTSSR1966	4	24.089	tct	F: AGCTCTCTCTTAATCTCACTTTCA	193/196	193/196	196/*
				R: GCCTCGCCGATTGATTTGAC
MB84382	4	24.165	ac	F: CAAAGTTCAAGTGCATTGCC	283/291	283/291	301/304
				R: TGTTCCCTCAAATCCTCTGG
Ptri41	19	0.102	a	F: TCCAACATTGCTGTTTTCCTC	159/172	159/172	172/*
				R: CTTCACTGCTGTGTTCTAAAAGG
Ptri59	19	0.12	t	F: CATGGAAACGAGGACATCAA	282/296	282/296	284/*
				R: CCTAAGCCGAACCGAGTTTA
MB50000	19	0.142	ct	F: CAACAGACCCATGAATGCAC	284/286	284/286	282/286
				R: TCACATACCAGCAAGAAGCG
MB50030	19	0.225	ta	F: TCTCTTAGATTGCACTACAATGGG	193/197	193/197	217/225
				R: TTTTCCGTGATCATTCACTCA
MB50065	19	0.301	a	F: CACCAAAATTAAAGGGCCAA	204/218	204/218	201/*
				R: GCATGCTAGTGCCTTTTCCT
MB50066	19	0.316	tcc	F: ATTTAAGGCCTCCGGAAGAA	261/267	261/267	255
				R: TGAGCCTCGAGGAGATTCAT
MB50124	19	0.435	t	F: TTTTTCAGCAGCCATGCTTT	167/175	167/175	169/173
				R: CTTGATTGGATTTCATCCGAG
MB41376	19	1.94	at	F: GAGCAGGTGACTCGTGAACA	251/255	251/255	251
				R: GGAGAGTGATAAAACCAACAATCC
MB41412	19	2.139	ta	F: ATGGGCACAGAGGTTTTCAA	295/299	295/299	291/*
				R: GCTCCCTTACCGCTCTAGGA
MB74983	19	2.139	at	F: ATGCCCCAAATGCAATTAAA	230/236	230/236	227/*
				R: ATGGGCACAGAGGTTTTCAA
LG_XIX-23	19	2.18	cag	F: CAAGATCGGTGAGGATTTAC	352/360	352/360	358/360
				R: AAAGAGCAAATCCACTGGTA
MB74958	19	2.234	t	F: CTTTCTGCTTCTGGAATGGG	242/260	242/260	224/*
				R: TGACATCTGGTTGTTGAGCA
MB41481	19	2.269	ata	F: CCATCCATCCTCAATTTCCT	214/223	214/223	223/226
				R: GGTGTTCGGCTCTTCTTCTG
MB74947	19	2.269	att	F: GGTGTTCGGCTCTTCTTCTG	215/224	215/224	224/227
				R: CCATCCATCCTCAATTTCCT
MB41490	19	2.283	tc	F: CGATATCAATCGTCCGGTTC	117/119	117/119	177/*
				R: CCTTTGGATTATCCGCTTCA
MB74943	19	2.284	ga	F: CCTTTGGATTATCCGCTTCA	116/118	116/118	120/*
				R: CGATATCAATCGTCCGGTTC
MB41525	19	2.383	gt	F: GCACGACCAGAGTTTAATTTCA	285/295	285/295	285/289
				R: CATTGGCCTTGCTGAACTATT
MB41528	19	2.405	tg	F: CCCGGCATTTATGAAGGTAA	180/182	180/182	180/186
				R: GTCTGCCATGGTCAAAGCTC
MB41583	19	2.58	gcg	F: CAAGTTGGCTTGGATGGATT	144/162	144/162	146/149
				R: AACCAGCCCAACAAATCAAG
MB41596	19	2.723	ta	F: CGCACTAAAAAGTTACCGCC	254/266	254/266	256/266
				R: AGGCAACTATGCCTTTGAGC
MB41602	19	2.746	ga	F: TCTGGGGGCTCTCTCTGTTA	272/282	272/282	270/276
				R: TATGAAGCTCCCCAATGCTC
MB41607	19	2.761	at	F: CTGTTAGGCCCATGAGAAGC	200/208	200/208	200/203
				R: TCCAGTCAGCAGGACAAATG
MB41665	19	2.863	(gat)6	F: AAGCGCAGATTTCTTGGAGA	190/196	190/196	190/192
				R: CAACTTCCCCCTCTTCATCA
MB41666	19	2.872	(att)11	F: TTGGTTTCATCCGAAAGAGG	219/237	219/237	216/219
				R: CGATACGCAGAAACATCACC
MB41676	19	2.917	(tc)11	F: CCGTTGAGTTTGTTGCCTTT	280/282	280/282	282/294
				R: TTGTACAGCTTATGCGCCAG
MB55349	19	3.68	(tc)10	F: GGACACGTGATGTCATGGAG	264/268	264/268	258/260
				R: TCAAATGCAAAGCCCTTTTT
MB55261	19	3.908	aata	F: TTGTGAGGTGGGGAATTCAT	127/131	127/131	131
				R: CGACTCGTGTTTCTGGTTGA
MB55263	19	3.908	aata	F: TTGTGAGGTGGGGAATTCAT	190/194	190/194	194
				R: TTTCAAAGGGTATTGGCGAG
MB55030	19	4.446	(ta)a(aag）	F: ATGGGCTGCCTGAAAATATG	193/197	193/197	217/225
				R: TCCCTTGCCAAATGTATGAA
MB54907	19	4.713	ga	F: TAGCAAAAGCAGCAGCAGAG	262/300	262/300	262/378
				R: CAAGTGCGTGAAAAACATGG
MB54802	19	4.986	gca	F: CCTAATTTGCAGCAGCATCA	193/199	193/199	196/214
				R: CAAGCATCCTGGTAAGCCAT
MB54787	19	5.067	(ta）g（ac）	F: TGCCTTACATGGGAGGACAT	235/241	235/241	217/231
				R: ACAACCCCATGCTGAAAAAG
MB54763	19	5.159	tta	F: AGTTGAATTTGCGCTTCGAT	128/134	128/134	128/*
				R: TAGGGTGTGGCCAACATACA
MB84322	19	5.526	tta	F: GCATGCTGTTTGCATCTAAAG	234/248	234/248	234/*
				R: ATTAAACCTCGGGTCCTGGT
MB120551	19	7.326	tta	F: TCAGCAAGGTGGCATTACAA	196/202	196/202	196
				R: TCTGGGAACGAACTTGCTCT
MB88868	19	7.344	at	F: CCAGGAGGTGACTTGTACTGC	290/318	290/318	280/304
				R: ACGATGGACCTCCATTGAAA
MB88835	19	7.468	caa	F: TTCGAAAGATCATCATCGTCA	282/291	282/291	291/297
				R: TCAATTTTCTCTGAAACCAAACAA
MB120481	19	7.576	tc	F: GGAACCAATGTGCTACATGC	224/240	224/240	224/234
				R: GTGGGCAAGCTCTTTGAAAC
MB120471	19	7.627	at	F: CAGGGTCCGTTTGGTCTTTA	186/198	186/198	186
				R: AACCTACCAACCATGCCAAA
MB120417	19	7.816	ct	F: GAAAGTAACGATGGCGGTGT	233/249	233/249	237/253
				R: GGAGAGTGAGGAGCAGAGGA
MB120413	19	7.925	t	F: GGGTTAGGGTTTCCCATTGT	285/291	285/291	285/287
				R: TTGCTTCATAGCTTCGAGGG
MB120414	19	7.927	tg	F: GTGGCGAAGCTTTATTCCTG	297/311	297/311	307/311
				R: TAAAGCCCAAAGCAGTCACC
MB120398	19	8.002	a	F: CGTATAAAATGGAGGCTGGC	153/158	153/158	153/156
				R: GAACCTGTGTCTACTGAAGTGGTG
PTSSR1853	19	8.111	ttat	F: AGTTTCCTCGGTCACAGCTG	293/297	293/297	290/293
				R: GGAGGACACTACGCCCTTTT
MB83210	19	8.178	ga	F: CAGTGTAGTTGCTGGCTGGA	282/294	282/294	286/288
				R: TTACGGTGCGTGCTAGATTG
MB83232	19	8.226	a	F: GCTCCCAACATTTCCTTTCA	274/278	274/278	268/274
				R: TCCTTGTTGCATATGCTTGC
MB83233	19	8.228	a	F: GTCTCTCCTTCGAGCTGCAT	219/225	219/225	219
				R: GCAGAAGGTTCTGGTTCTTTCA
LG_XIX-11	19	8.77	atca	F: CAACATGAAATGAGCTGCTA	398/404	398/404	404/408
				R: TCCACATGATGTCTGATTTG
MB125160	19	8.852	ct	F: GAGGATGCCCAACTTTGAGA	212/216	212/216	216
				R: TGTCATTGAGGATGGGGATT
PTSSR2663	19	8.944	gca	F: TCCAAGGATGACAGCATGGA	246/252	246/252	254/*
				R: CATCCGAATAGTGGGCTCCC
MB60002	19	9.031	ct	F: GGATGTCGGGACTCCACTAA	283/293	283/293	286
				R: CAGGGGGAACAGTTGAGAGA
MB125218	19	9.031	tc	F: GCTTGCCTTCTTTCGTCAAG	120/128	120/128	122
				R: GGGCAACAAAATCTAAACAAAAA
MB125224	19	9.031	tc	F: GCTTGCCTTCTTTCGTCAAG	255/263	255/263	257
				R: CAGGGGGAACAGTTGAGAGA
MB60011	19	9.048	tcttt	F: GCTTAGCAACTCTTTTGCCC	269/274	269/274	264/274
				R: AGGGGTGTCTCATTTTGCTG
MB125240	19	9.07	at	F: CTTGGAGAAAACCTAAGGCG	298/302	298/302	290/318
				R: AGCATACATGTTTTTGCGGA
MB125298	19	9.516	at	F: TCTTCTTCTTTGACCCAGCC	271/275	271/275	265/267
				R: CCGCTGCTTCTTTAGTACTCTCA
MB125301	19	9.516	at	F: GACGGCAGCTACACAAATCC	287/291	287/291	281/283
				R: CATTAACAAGCTTCTCGGGC
MB125305	19	9.517	t	F: GGCTCTTCACACTCCTTGGT	273/276	273/276	273/*
				R: GCATTCCCAGGACGAAGTAA
MB125350	19	9.649	tc	F: AAAGAGTCAACGGGCAAAAA	284/290	284/290	292/300
				R: AGTGGCAGCTGAATGGAAAT
MB125418	19	9.846	gtt	F: GCTGTTCAAATTGGCAAGGT	242/245	242/245	242
				R: TTTCATCTCCCCTGCCATAG
MB125420	19	9.864	t	F: GAAAGGCAAGCATGAGGACT	298/306	298/306	298/302
				R: GTGCGTCGGGAAATTACAAC
MB125429	19	9.893	ct	F: TTCTCACACTCATTGCTGCC	205/209	205/209	205/*
				R: TCTCCACATGCCTACCACAC
MB83139	19	10.171	(ct)gtg(tc)	F: TCATCAATCAAGCCACCTCA	166/188	166/188	156/178
				R: CAAGAAGCATGTGGATGGTG
MB37553	19	10.266	ta	F: TGACCAAGAGATTGCCACAG	298/306	298/306	317/343
				R: GAAAGTTTCATGTGCCGGAT
MB54431	19	10.266	ta	F: GAAAGTTTCATGTGCCGGAT	296/304	296/304	314/340
				R: TGACCAAGAGATTGCCACAG
MB19438	19	11.078	ct	F: AGGTACATGAAGTCCAGCCG	232/248	232/248	213/226
				R: TGATGCTGTGGAAGCTTTTG
MB125779	19	11.237	t	F: TTGAAGTATGATTAGCATCCTCG	112/115	112/115	115/123
				R: TCCCTCTGGTTACCATTTGC
MB125780	19	11.237	tct	F: CACGCCTATAATGGCGAGAT	228/230	228/230	228/236
				R: AAAGGATTTTGATGGGGACC
PTSSR1526	19	11.328	ga	F: TTCCTCCGTGGTGGTTGATG	258/268	258/268	256/266
				R: CCTCCCCTCCTTTTAAGCCC
MB125876	19	11.43	a	F: ACCCAGCTGAGCACTTTTGT	287/293	287/293	285/291
				R: AAGTTCTTTAAGCTGCCCCC
MB77	19	11.866	ac	F: GTGGTGACCCATCTTGGTTT	228/230	228/230	212/222
				R: CCGGTTCTCTTGTTTTCGTT
MB115	19	11.979	t	F: AATTAATTCAATCCACGGCG	149/173	149/173	169/*
				R: AGGCCATTCATACTTCGATTG
MB211	19	12.328	a	F: AACAAAATCCCACAAGCCAA	176/182	176/182	178/182
				R: AAAACCTCTGCTGCTGCAAT
MB256	19	12.415	agac	F: GTAGTCACGGGAAGCACCAT	246/250	246/250	246
				R: CATTTCTCGCAGCATTTGAA
MB70130	19	15.319	a	F: TGCTCCAGAGGTTACTCCGT	233/239	233/239	233
				R: TCCAATGATGGATCTGGTGA
MB70133	19	15.341	gtga	F: CAAGTCCAACATCGCCTTCT	260/264	260/264	264/268
				R: GACAATCGGCGAAACCTCTA
GCPM_2321-2	19	15.36	tct	F: TTCCTTTGCATGTCCTTTAT	169/178	169/178	172
				R: TGTAACACACGGTTCTACCA
PTSSR1245	19	15.447	aag	F: TGGCGGAGAGGAATACCAGA	246/252	246/252	244/247
				R: CCCATTGATTCTTCCAAGTACACC
PTSSR1123	19	15.447	ttc	F: TCTGGTATTCCTCTCCGCCA	301/310	301/310	301/307
				R: AAACCCCATTTCCACCCCTG
* indicated allele deletion.
